# Supplementary material
Source: Research Square preprint supplement (doi:10.21203/rs.3.rs-9179453/v1)
Supplement: Supplementary file 1 [file supplementary_information.pdf › supp/supplementary_information.pdf]

# Supplementary Information

## Supplementary Tables

**Supplementary Table 1. Truvari benchmarking metrics for real genomic intervals (GRCh38)**

Benchmarking results from Truvari for structural variant callers evaluated against the Genome in a Bottle (GIAB) truth set using real genomic intervals. Results are stratified by sequencing technology (Illumina WES, Illumina WGS, ONT, PacBio), SV caller (Manta, CuteSV, Sniffles, Pbsv), and target region (gene panel, high confidence, WES+UTR). TP.b = true positives (base), TP.c = true positives (comp), FP = false positives, FN = false negatives, Prec = precision, Rec = recall, Base = base count, Comp = comp count, GT = genotype concordance.

| Tech         | Caller   | Region     | TP.b | TP.c | FP   | FN   | Prec  | Rec   | F1    | Base | Comp  | GT    |
|--------------|----------|------------|------|------|------|------|-------|-------|-------|------|-------|-------|
| Illumina_WES | Manta    | gene_panel | 4    | 4    | 0    | 1297 | 1.000 | 0.003 | 0.006 | 1301 | 4     | 1.000 |
| Illumina_WES | Manta    | high_conf  | 14   | 14   | 19   | 9685 | 0.424 | 0.001 | 0.003 | 9699 | 33    | 1.000 |
| Illumina_WES | Manta    | wes_utr    | 7    | 7    | 18   | 254  | 0.280 | 0.027 | 0.049 | 261  | 25    | 1.000 |
| Illumina_WGS | Manta    | gene_panel | 565  | 565  | 43   | 736  | 0.929 | 0.434 | 0.592 | 1301 | 608   | 0.961 |
| Illumina_WGS | Manta    | high_conf  | 4499 | 4499 | 326  | 5200 | 0.932 | 0.464 | 0.620 | 9699 | 4825  | 0.961 |
| Illumina_WGS | Manta    | wes_utr    | 117  | 117  | 24   | 144  | 0.830 | 0.448 | 0.582 | 261  | 141   | 0.991 |
| ONT          | CuteSV   | gene_panel | 1216 | 1216 | 205  | 85   | 0.856 | 0.935 | 0.893 | 1301 | 1421  | 0.000 |
| ONT          | CuteSV   | high_conf  | 9130 | 9130 | 1417 | 569  | 0.866 | 0.941 | 0.902 | 9699 | 10547 | 0.000 |
| ONT          | CuteSV   | wes_utr    | 225  | 225  | 73   | 36   | 0.755 | 0.862 | 0.805 | 261  | 298   | 0.000 |
| ONT          | Sniffles | gene_panel | 1225 | 1225 | 96   | 76   | 0.927 | 0.942 | 0.934 | 1301 | 1321  | 0.970 |
| ONT          | Sniffles | high_conf  | 9140 | 9140 | 691  | 559  | 0.930 | 0.942 | 0.936 | 9699 | 9831  | 0.958 |
| ONT          | Sniffles | wes_utr    | 219  | 219  | 46   | 42   | 0.826 | 0.839 | 0.833 | 261  | 265   | 0.954 |
| PacBio       | CuteSV   | gene_panel | 1241 | 1241 | 112  | 60   | 0.917 | 0.954 | 0.935 | 1301 | 1353  | 0.000 |
| PacBio       | CuteSV   | high_conf  | 9295 | 9295 | 819  | 404  | 0.919 | 0.958 | 0.938 | 9699 | 10114 | 0.000 |
| PacBio       | CuteSV   | wes_utr    | 230  | 230  | 40   | 31   | 0.852 | 0.881 | 0.866 | 261  | 270   | 0.000 |
| PacBio       | Pbsv     | gene_panel | 1240 | 1240 | 90   | 61   | 0.932 | 0.953 | 0.943 | 1301 | 1330  | 0.957 |
| PacBio       | Pbsv     | high_conf  | 9301 | 9301 | 747  | 398  | 0.926 | 0.959 | 0.942 | 9699 | 10048 | 0.965 |
| PacBio       | Pbsv     | wes_utr    | 231  | 231  | 48   | 30   | 0.828 | 0.885 | 0.856 | 261  | 279   | 0.961 |

**Supplementary Table 2. Truvari benchmarking metrics for real genomic intervals (GRCh37)**

Benchmarking results from Truvari for structural variant callers evaluated against the Genome in a Bottle (GIAB) truth set using real genomic intervals on GRCh37 reference genome. Results are stratified by sequencing technology (Illumina WES, Illumina WGS, ONT, PacBio), SV caller (Manta, CuteSV, Sniffles, Pbsv), and target region (gene panel, high confidence, WES+UTR). Column abbreviations are as in Supplementary Table 1.

| Tech         | Caller   | Region     | TP.b | TP.c | FP   | FN   | Prec  | Rec   | F1    | Base | Comp  | GT    |
|--------------|----------|------------|------|------|------|------|-------|-------|-------|------|-------|-------|
| Illumina_WES | Manta    | gene_panel | 4    | 4    | 0    | 1297 | 1.000 | 0.003 | 0.006 | 1301 | 4     | 1.000 |
| Illumina_WES | Manta    | high_conf  | 14   | 14   | 19   | 9685 | 0.424 | 0.001 | 0.003 | 9699 | 33    | 1.000 |
| Illumina_WES | Manta    | wes_utr    | 7    | 7    | 18   | 254  | 0.280 | 0.027 | 0.049 | 261  | 25    | 1.000 |
| Illumina_WGS | Manta    | gene_panel | 565  | 565  | 43   | 736  | 0.929 | 0.434 | 0.592 | 1301 | 608   | 0.961 |
| Illumina_WGS | Manta    | high_conf  | 4499 | 4499 | 326  | 5200 | 0.932 | 0.464 | 0.620 | 9699 | 4825  | 0.961 |
| Illumina_WGS | Manta    | wes_utr    | 117  | 117  | 24   | 144  | 0.830 | 0.448 | 0.582 | 261  | 141   | 0.991 |
| ONT          | CuteSV   | gene_panel | 1216 | 1216 | 205  | 85   | 0.856 | 0.935 | 0.893 | 1301 | 1421  | 0.000 |
| ONT          | CuteSV   | high_conf  | 9130 | 9130 | 1417 | 569  | 0.866 | 0.941 | 0.902 | 9699 | 10547 | 0.000 |
| ONT          | CuteSV   | wes_utr    | 225  | 225  | 73   | 36   | 0.755 | 0.862 | 0.805 | 261  | 298   | 0.000 |
| ONT          | Sniffles | gene_panel | 1225 | 1225 | 96   | 76   | 0.927 | 0.942 | 0.934 | 1301 | 1321  | 0.970 |
| ONT          | Sniffles | high_conf  | 9140 | 9140 | 691  | 559  | 0.930 | 0.942 | 0.936 | 9699 | 9831  | 0.958 |
| ONT          | Sniffles | wes_utr    | 219  | 219  | 46   | 42   | 0.826 | 0.839 | 0.833 | 261  | 265   | 0.954 |
| PacBio       | CuteSV   | gene_panel | 1241 | 1241 | 112  | 60   | 0.917 | 0.954 | 0.935 | 1301 | 1353  | 0.000 |
| PacBio       | CuteSV   | high_conf  | 9295 | 9295 | 819  | 404  | 0.919 | 0.958 | 0.938 | 9699 | 10114 | 0.000 |
| PacBio       | CuteSV   | wes_utr    | 230  | 230  | 40   | 31   | 0.852 | 0.881 | 0.866 | 261  | 270   | 0.000 |
| PacBio       | Pbsv     | gene_panel | 1240 | 1240 | 90   | 61   | 0.932 | 0.953 | 0.943 | 1301 | 1330  | 0.957 |
| PacBio       | Pbsv     | high_conf  | 9301 | 9301 | 747  | 398  | 0.926 | 0.959 | 0.942 | 9699 | 10048 | 0.965 |
| PacBio       | Pbsv     | wes_utr    | 231  | 231  | 48   | 30   | 0.828 | 0.885 | 0.856 | 261  | 279   | 0.961 |

### Supplementary Table 3a. Simulated intervals percentile ranks and KDE (GRCh38)

Percentile ranks and kernel density estimates (KDE) from simulation-based benchmarking on GRCh38. For each technology-caller-region combination, the table shows where real data metrics fall within the simulated distribution. Percentile rank indicates the proportion of simulated runs with lower metric values; KDE estimates the probability density at the real data value. Prec = precision, Rec = recall, %ile = percentile.

| Combination                   | Prec %ile | Rec %ile | F1 %ile | Prec KDE | Rec KDE | F1 KDE |
|-------------------------------|-----------|----------|---------|----------|---------|--------|
| Illumina_WGS.Manta.gene_panel | 25.64     | 0.00     | 0       | 0.247    | 1.000   | 1.000  |
| ONT.CuteSV.gene_panel         | 98.29     | 99.15    | 100     | 0.874    | 0.976   | 0.986  |
| PacBio.CuteSV.gene_panel      | 100.00    | 100.00   | 100     | 0.997    | 1.000   | 1.000  |
| ONT.Sniffles.gene_panel       | 100.00    | 100.00   | 100     | 0.981    | 1.000   | 1.000  |
| PacBio.Pbsv.gene_panel        | 100.00    | 100.00   | 100     | 1.000    | 0.985   | 1.000  |
| Illumina_WGS.Manta.high_conf  | 36.75     | 0.00     | 0       | 0.125    | 1.000   | 1.000  |
| ONT.CuteSV.high_conf          | 100.00    | 100.00   | 100     | 0.976    | 0.993   | 1.000  |
| PacBio.CuteSV.high_conf       | 100.00    | 100.00   | 100     | 0.999    | 1.000   | 1.000  |
| ONT.Sniffles.high_conf        | 100.00    | 100.00   | 100     | 0.994    | 1.000   | 1.000  |
| PacBio.Pbsv.high_conf         | 100.00    | 100.00   | 100     | 1.000    | 0.999   | 1.000  |
| Illumina_WGS.Manta.wes utr    | 0.00      | 0.00     | 0       | 1.000    | 1.000   | 1.000  |
| ONT.CuteSV.wes utr            | 0.00      | 0.00     | 0       | 1.000    | 0.981   | 1.000  |
| PacBio.CuteSV.wes utr         | 8.55      | 0.00     | 0       | 0.504    | 1.000   | 0.981  |
| ONT.Sniffles.wes utr          | 0.00      | 0.00     | 0       | 1.000    | 1.000   | 1.000  |
| PacBio.Pbsv.wes utr           | 0.00      | 0.00     | 0       | 0.989    | 1.000   | 1.000  |

### Supplementary Table 3b. Simulated intervals medians, differences, and variability (GRCh38)

Median values, differences, and standard deviations from simulation-based benchmarking on GRCh38. For each technology-caller-region combination, the table shows median metric values across simulations, the difference between real data and simulated median (real minus simulated), and the standard deviation across simulation replicates. Prec = precision, Rec = recall, med = median, diff = difference, SD = standard deviation.

| Combination                   | Prec med | Rec med | F1 med | Prec diff | Rec diff | F1 diff | Prec SD | Rec SD | F1 SD |
|-------------------------------|----------|---------|--------|-----------|----------|---------|---------|--------|-------|
| Illumina_WGS.Manta.gene_panel | 0.936    | 0.612   | 0.740  | 0.007     | 0.177    | 0.148   | 0.011   | 0.017  | 0.013 |
| ONT.CuteSV.gene_panel         | 0.825    | 0.900   | 0.861  | -0.030    | -0.035   | -0.033  | 0.014   | 0.011  | 0.010 |
| PacBio.CuteSV.gene_panel      | 0.874    | 0.918   | 0.894  | -0.044    | -0.036   | -0.041  | 0.015   | 0.009  | 0.010 |
| ONT.Sniffles.gene_panel       | 0.889    | 0.888   | 0.888  | -0.038    | -0.053   | -0.046  | 0.013   | 0.010  | 0.009 |
| PacBio.Pbsv.gene_panel        | 0.866    | 0.926   | 0.895  | -0.067    | -0.028   | -0.047  | 0.013   | 0.010  | 0.009 |
| Illumina_WGS.Manta.high_conf  | 0.936    | 0.612   | 0.740  | 0.004     | 0.148    | 0.120   | 0.011   | 0.017  | 0.013 |
| ONT.CuteSV.high_conf          | 0.825    | 0.900   | 0.861  | -0.040    | -0.042   | -0.041  | 0.014   | 0.011  | 0.010 |
| PacBio.CuteSV.high_conf       | 0.874    | 0.918   | 0.894  | -0.045    | -0.040   | -0.044  | 0.015   | 0.009  | 0.010 |
| ONT.Sniffles.high_conf        | 0.889    | 0.888   | 0.888  | -0.041    | -0.054   | -0.048  | 0.013   | 0.010  | 0.009 |
| PacBio.Pbsv.high_conf         | 0.866    | 0.926   | 0.895  | -0.060    | -0.033   | -0.047  | 0.013   | 0.010  | 0.009 |
| Illumina_WGS.Manta.wes utr    | 0.936    | 0.612   | 0.740  | 0.107     | 0.163    | 0.157   | 0.011   | 0.017  | 0.013 |
| ONT.CuteSV.wes utr            | 0.825    | 0.900   | 0.861  | 0.070     | 0.038    | 0.056   | 0.014   | 0.011  | 0.010 |
| PacBio.CuteSV.wes utr         | 0.874    | 0.918   | 0.894  | 0.022     | 0.037    | 0.028   | 0.015   | 0.009  | 0.010 |
| ONT.Sniffles.wes utr          | 0.889    | 0.888   | 0.888  | 0.062     | 0.049    | 0.056   | 0.013   | 0.010  | 0.009 |
| PacBio.Pbsv.wes utr           | 0.866    | 0.926   | 0.895  | 0.038     | 0.040    | 0.040   | 0.013   | 0.010  | 0.009 |

### Supplementary Table 4a. Simulated intervals percentile ranks and KDE (GRCh37)

Percentile ranks and kernel density estimates (KDE) from simulation-based benchmarking on GRCh37. For each technology-caller-region combination, the table shows where real data metrics fall within the simulated distribution. Column abbreviations are as in Supplementary Table 3a.

| Combination                   | Prec %ile | Rec %ile | F1 %ile | Prec KDE | Rec KDE | F1 KDE |
|-------------------------------|-----------|----------|---------|----------|---------|--------|
| Illumina_WGS-Manta-gene_panel | 32.43     | 0.00     | 0       | 0.236    | 1.000   | 1.000  |
| ONT-CuteSV-gene_panel         | 98.20     | 99.10    | 100     | 0.801    | 0.976   | 0.985  |
| ONT-Sniffles-gene_panel       | 100.00    | 100.00   | 100     | 0.997    | 1.000   | 1.000  |
| PacBio-CuteSV-gene_panel      | 100.00    | 100.00   | 100     | 0.999    | 1.000   | 1.000  |
| PacBio-Pbsv-gene_panel        | 100.00    | 100.00   | 100     | 1.000    | 0.997   | 1.000  |
| Illumina_WGS-Manta-high_conf  | 39.64     | 0.00     | 0       | 0.126    | 1.000   | 1.000  |
| ONT-CuteSV-high_conf          | 100.00    | 100.00   | 100     | 0.949    | 0.993   | 1.000  |
| ONT-Sniffles-high_conf        | 100.00    | 100.00   | 100     | 0.999    | 1.000   | 1.000  |
| PacBio-CuteSV-high_conf       | 100.00    | 100.00   | 100     | 1.000    | 1.000   | 1.000  |
| PacBio-Pbsv-high_conf         | 100.00    | 100.00   | 100     | 1.000    | 1.000   | 1.000  |
| Illumina_WGS-Manta-wes_utr    | 0.00      | 0.00     | 0       | 1.000    | 1.000   | 1.000  |
| ONT-CuteSV-wes_utr            | 0.00      | 0.90     | 0       | 1.000    | 0.961   | 1.000  |
| ONT-Sniffles-wes_utr          | 0.00      | 0.00     | 0       | 1.000    | 1.000   | 1.000  |
| PacBio-CuteSV-wes_utr         | 4.50      | 0.00     | 0       | 0.678    | 1.000   | 0.998  |
| PacBio-Pbsv-wes_utr           | 0.90      | 0.00     | 0       | 0.971    | 1.000   | 0.999  |

### Supplementary Table 4b. Simulated intervals medians, differences, and variability (GRCh37)

Median values, differences, and standard deviations from simulation-based benchmarking on GRCh37. For each technology-caller-region combination, the table shows median metric values across simulations, the difference between real data and simulated median, and the standard deviation. Column abbreviations are as in Supplementary Table 3b.

| Combination                   | Prec med | Rec med | F1 med | Prec diff | Rec diff | F1 diff | Prec SD | Rec SD | F1 SD |
|-------------------------------|----------|---------|--------|-----------|----------|---------|---------|--------|-------|
| Illumina_WGS-Manta-gene_panel | 0.936    | 0.609   | 0.738  | 0.006     | 0.175    | 0.146   | 0.011   | 0.019  | 0.015 |
| ONT-CuteSV-gene_panel         | 0.828    | 0.896   | 0.860  | -0.028    | -0.039   | -0.034  | 0.014   | 0.013  | 0.011 |
| ONT-Sniffles-gene_panel       | 0.889    | 0.885   | 0.887  | -0.038    | -0.057   | -0.048  | 0.011   | 0.012  | 0.009 |
| PacBio-CuteSV-gene_panel      | 0.873    | 0.919   | 0.897  | -0.044    | -0.035   | -0.039  | 0.013   | 0.010  | 0.009 |
| PacBio-Pbsv-gene_panel        | 0.867    | 0.923   | 0.894  | -0.065    | -0.031   | -0.049  | 0.014   | 0.010  | 0.010 |
| Illumina_WGS-Manta-high_conf  | 0.936    | 0.609   | 0.738  | 0.003     | 0.145    | 0.118   | 0.011   | 0.019  | 0.015 |
| ONT-CuteSV-high_conf          | 0.828    | 0.896   | 0.860  | -0.038    | -0.046   | -0.042  | 0.014   | 0.013  | 0.011 |
| ONT-Sniffles-high_conf        | 0.889    | 0.885   | 0.887  | -0.041    | -0.058   | -0.049  | 0.011   | 0.012  | 0.009 |
| PacBio-CuteSV-high_conf       | 0.873    | 0.919   | 0.897  | -0.046    | -0.039   | -0.042  | 0.013   | 0.010  | 0.009 |
| PacBio-Pbsv-high_conf         | 0.867    | 0.923   | 0.894  | -0.058    | -0.036   | -0.048  | 0.014   | 0.010  | 0.010 |
| Illumina_WGS-Manta-wes_utr    | 0.936    | 0.609   | 0.738  | 0.106     | 0.161    | 0.156   | 0.011   | 0.019  | 0.015 |
| ONT-CuteSV-wes_utr            | 0.828    | 0.896   | 0.860  | 0.073     | 0.033    | 0.055   | 0.014   | 0.013  | 0.011 |
| ONT-Sniffles-wes_utr          | 0.889    | 0.885   | 0.887  | 0.063     | 0.046    | 0.054   | 0.011   | 0.012  | 0.009 |
| PacBio-CuteSV-wes_utr         | 0.873    | 0.919   | 0.897  | 0.022     | 0.038    | 0.030   | 0.013   | 0.010  | 0.009 |
| PacBio-Pbsv-wes_utr           | 0.867    | 0.923   | 0.894  | 0.039     | 0.038    | 0.038   | 0.014   | 0.010  | 0.010 |

### Supplementary Data 1. Truvari benchmarking metrics for individual simulated intervals (GRCh38)

**Title:** Per-simulation Truvari benchmarking results across all technology-caller combinations.

**Legend:** Raw Truvari output metrics for each individual simulated target interval on GRCh38 reference genome. The table contains the same metrics as Supplementary Table 1 (TP.base, TP.comp, FP, FN, precision, recall, F1, base count, comp count, genotype concordance) but reported separately for each of the simulated intervals. Columns include technology, caller, and simulation identifier. Due to its size, this table is provided as a separate supplementary data file (TSV format).

File: *truvari\_metrics\_simulated\_intervals\_raw.tsv*

### Supplementary Data 2. Truvari benchmarking metrics for individual simulated intervals (GRCh37)

**Title:** Per-simulation Truvari benchmarking results across all technology-caller combinations (GRCh37).

**Legend:** Raw Truvari output metrics for each individual simulated target interval on GRCh37 reference genome. The table contains the same metrics as Supplementary Table 2 (TP.base, TP.comp, FP, FN, precision, recall, F1, base count, comp count, genotype concordance) but reported separately for each of the simulated intervals. Columns include technology, caller, and simulation identifier. Due to its size, this table is provided as a separate supplementary data file (TSV format).

File: *truvari\_metrics\_simulated\_intervals\_raw.tsv*

Supplementary Figures

Supplementary Figure 1. Difference of metrics medians between simulated and real data (GRCh38)

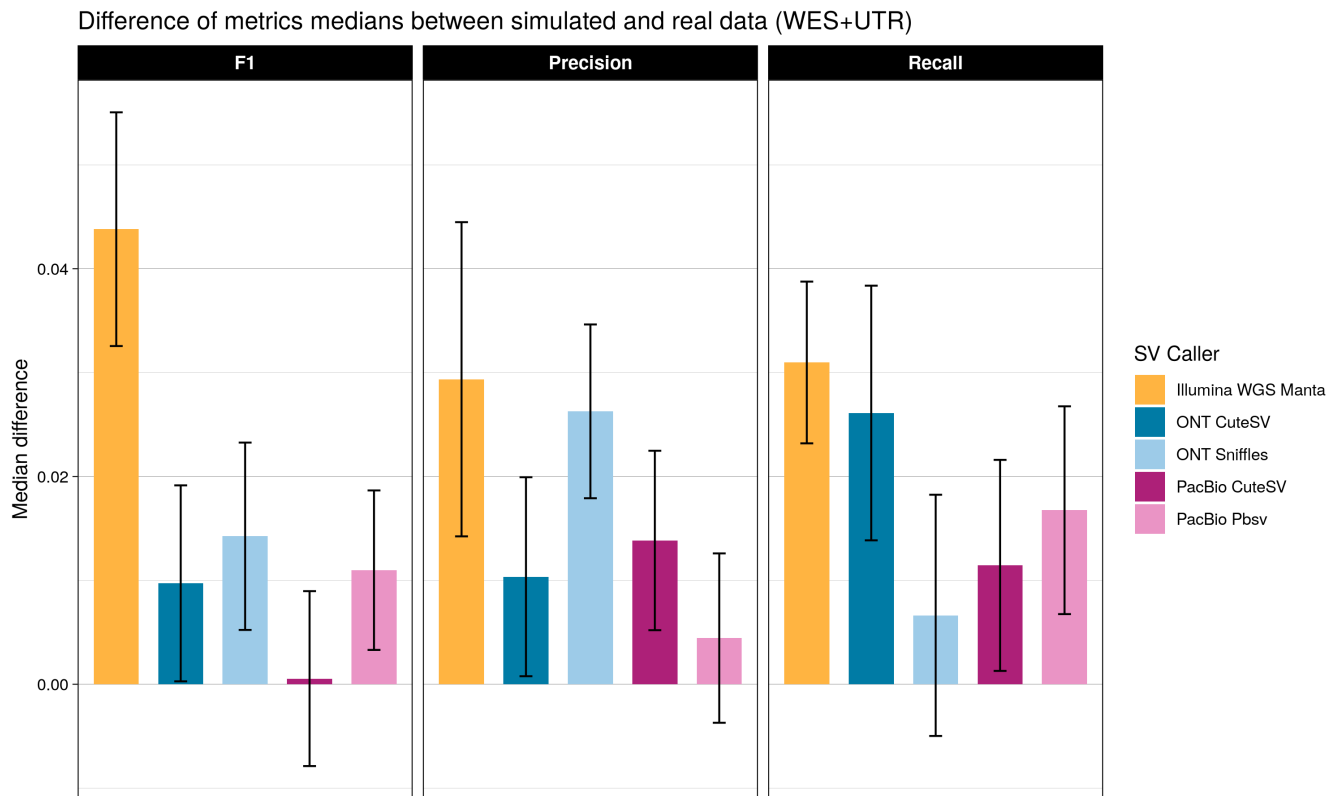

Bar plot showing the median difference in F1, precision, and recall between simulated and real benchmarking intervals (WES+UTR region) for each SV caller across sequencing technologies using the GRCh38 reference genome. Error bars represent the variability across simulation replicates. Illumina WGS Manta (orange) shows the largest median differences across all three metrics (F1, precision, and recall), indicating the greatest discrepancy between simulated and real interval performance. Long-read SV callers (ONT CuteSV, ONT Sniffles, PacBio CuteSV, PacBio Pbsv) demonstrate substantially smaller differences, suggesting that their benchmarking performance on simulated intervals more closely approximates performance on real genomic intervals.

Supplementary Figure 2. Difference of metrics medians between simulated and real data (GRCh37)

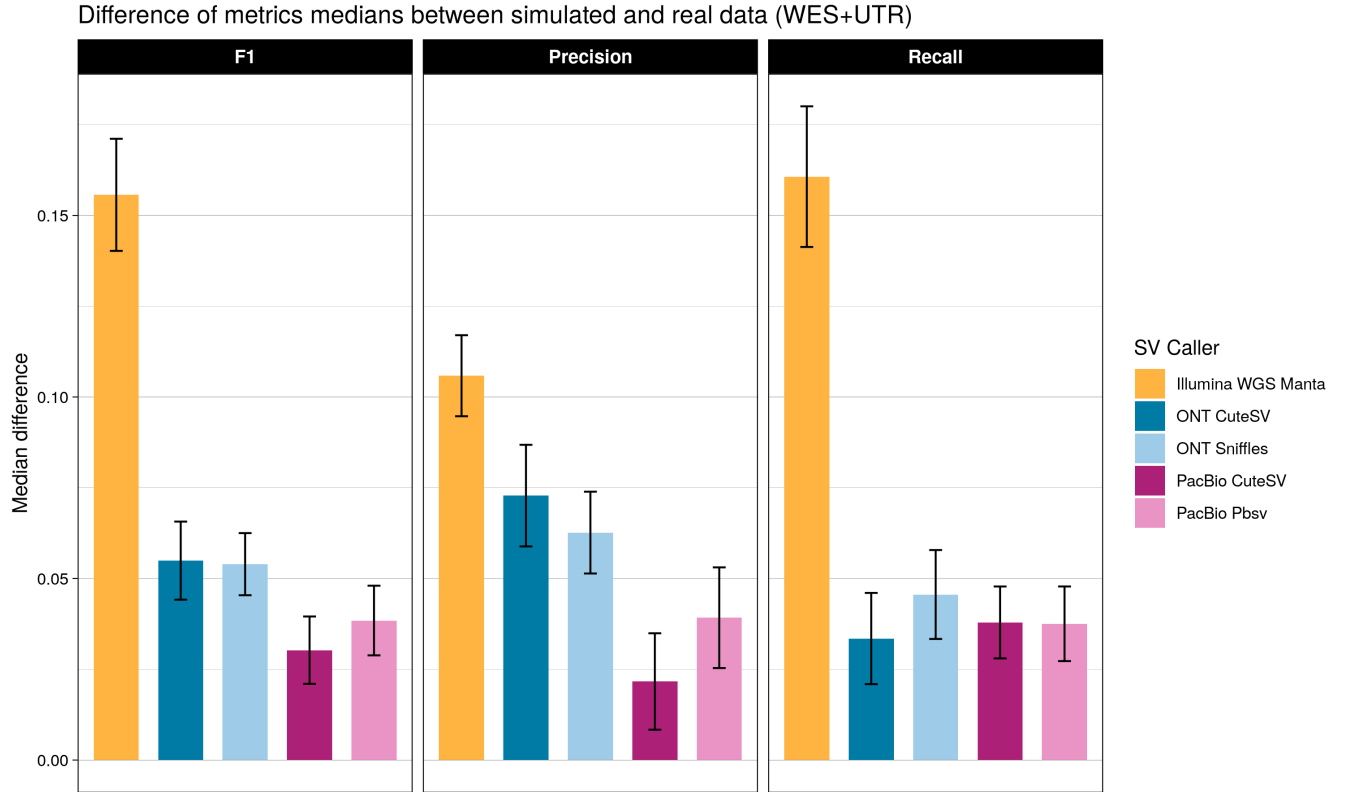

Bar plot showing the median difference in F1, precision, and recall between simulated and real benchmarking intervals (WES+UTR region) for each SV caller across sequencing technologies using the GRCh37 reference genome. Error bars represent the variability across simulation replicates. As with GRCh38, Illumina WGS Manta shows the largest median differences across all three metrics, while long-read SV callers demonstrate substantially smaller differences between simulated and real interval performance.
